# Supplementary material
Source: Springer Nature journal article supplement (https://www.springermedizin.de/resource/supplementary/12885_2006_501_MOESM4_ESM.pdf/9469628)

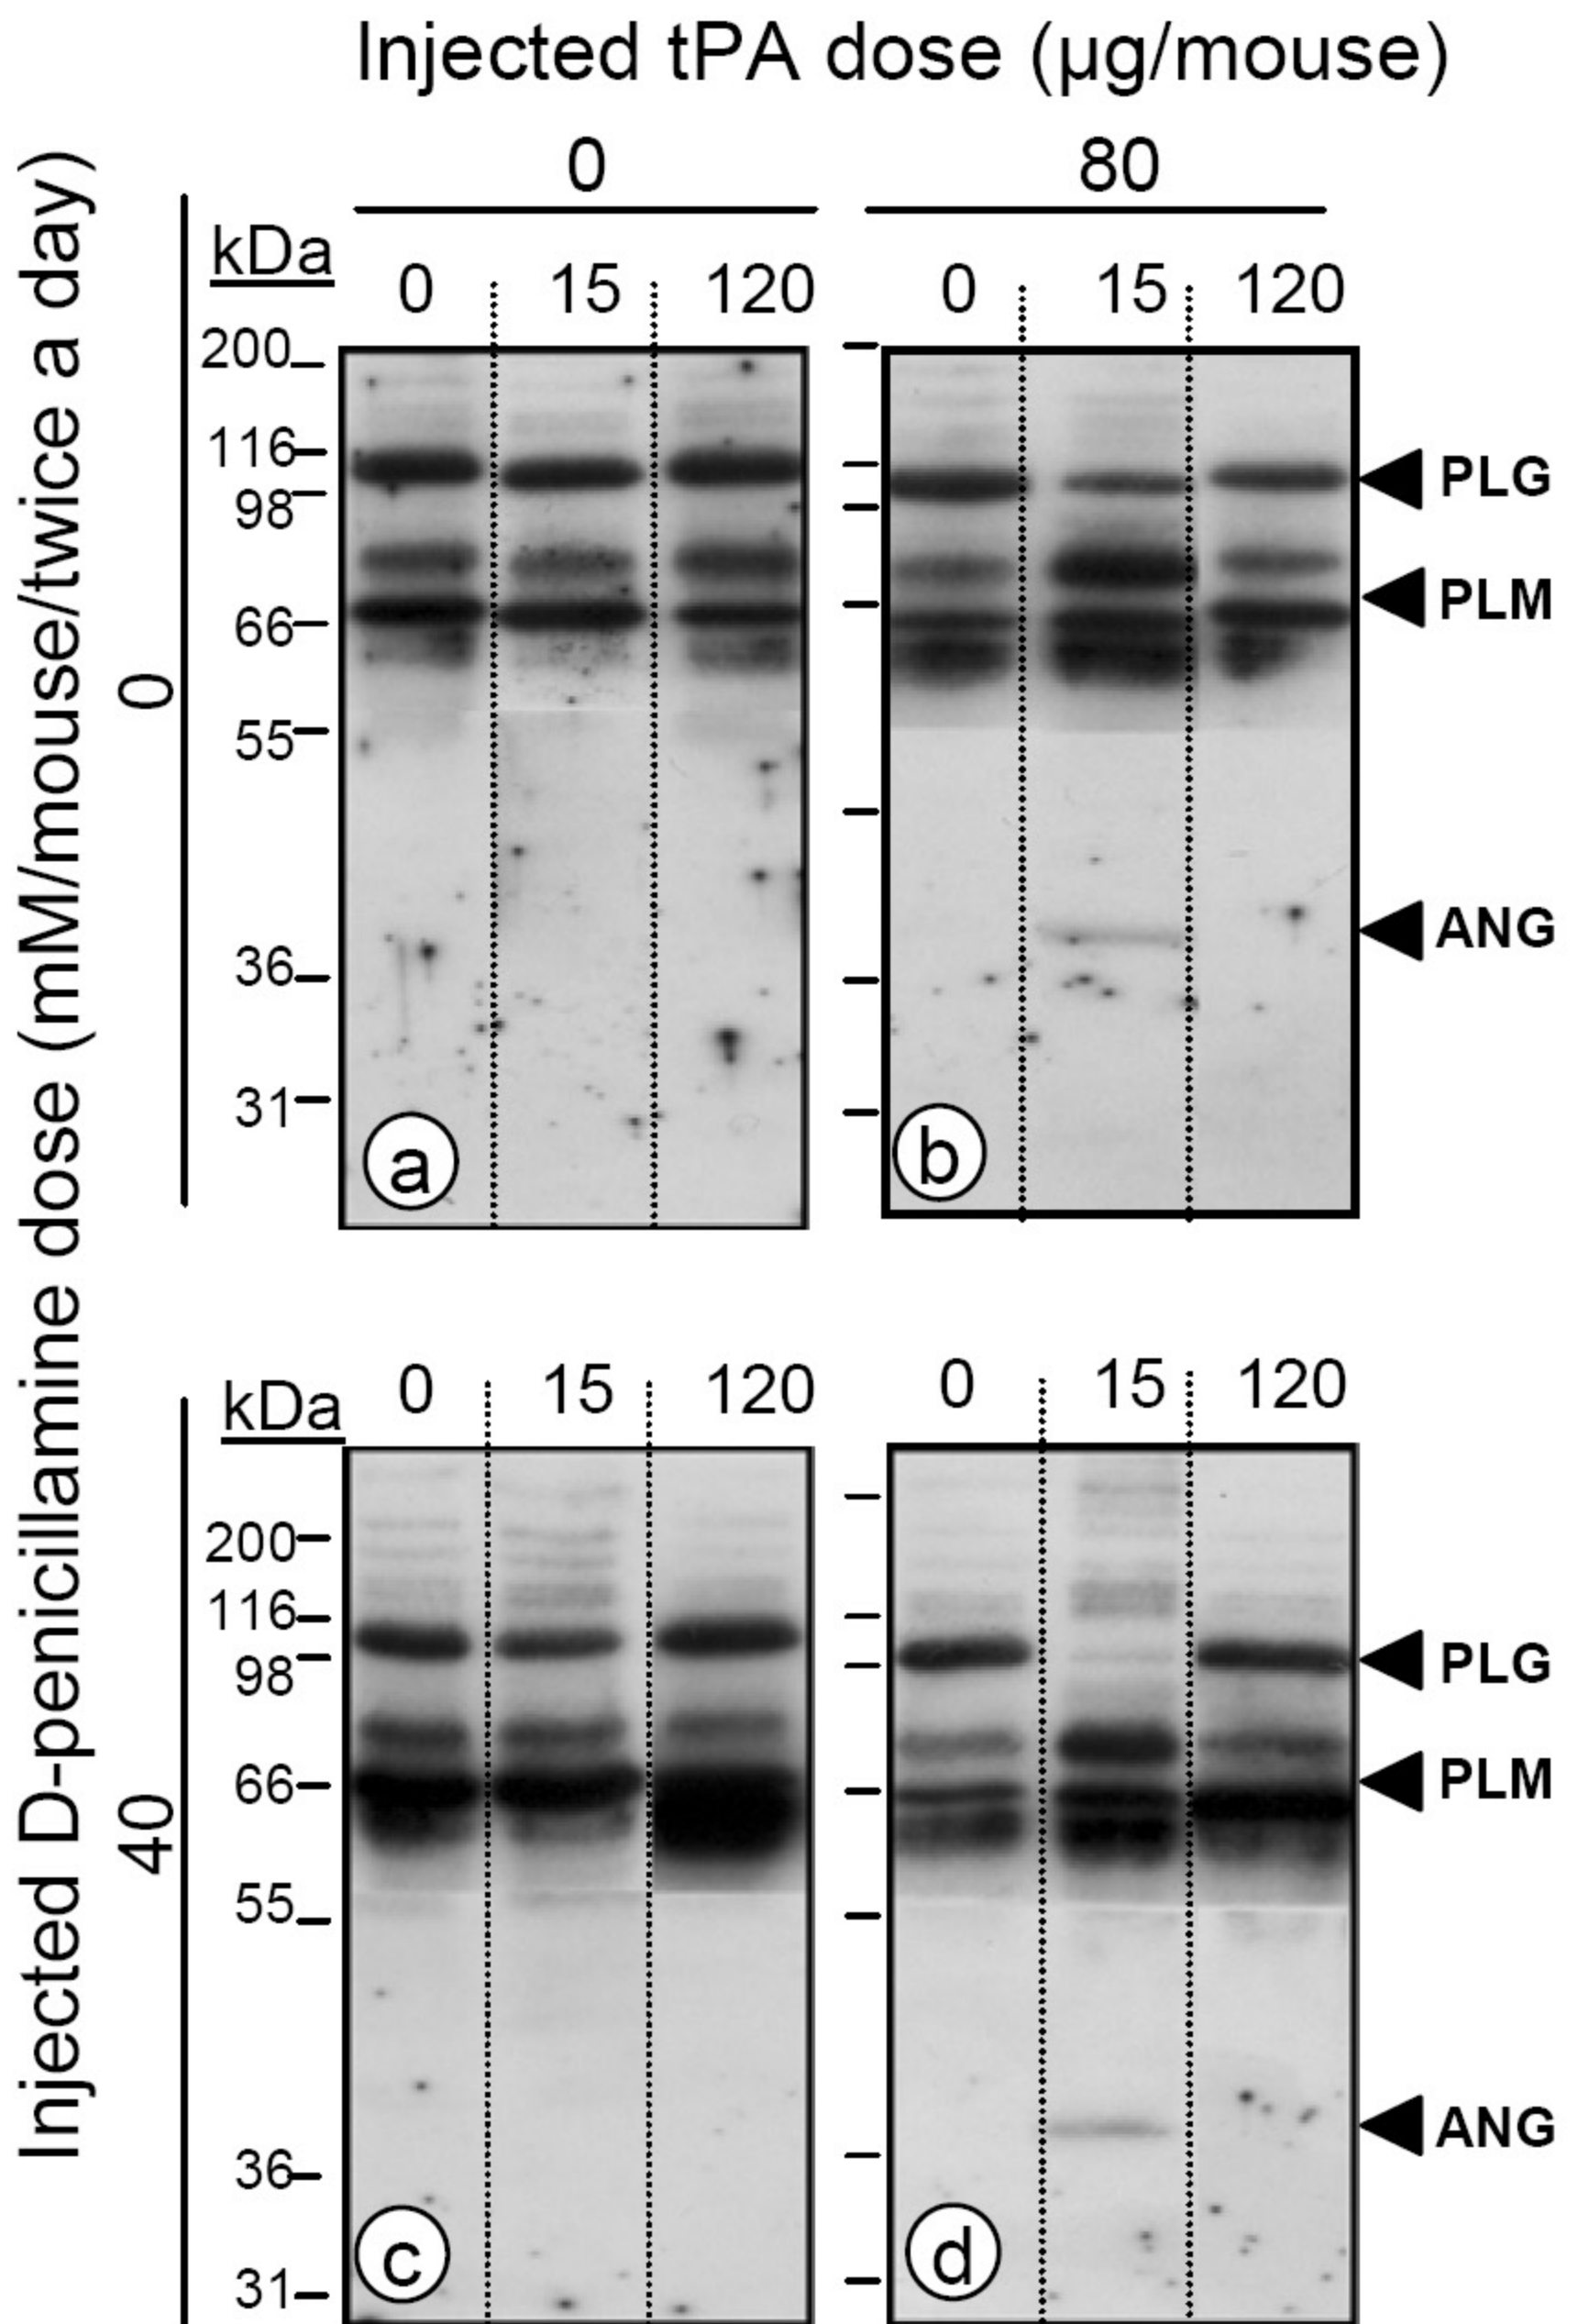

Supplement: MOESM4 [file 9469628]
